# Supplementary material for: A Single Dose of the Deactivated Rabies-Virus Vectored COVID-19 Vaccine, CORAVAX, Is Highly Efficacious and Alleviates Lung Inflammation in the Hamster Model
Source: MDPI journal article supplement (doi:10.3390/v14061126), 2022-05-24
Supplement: s1 [file s1]

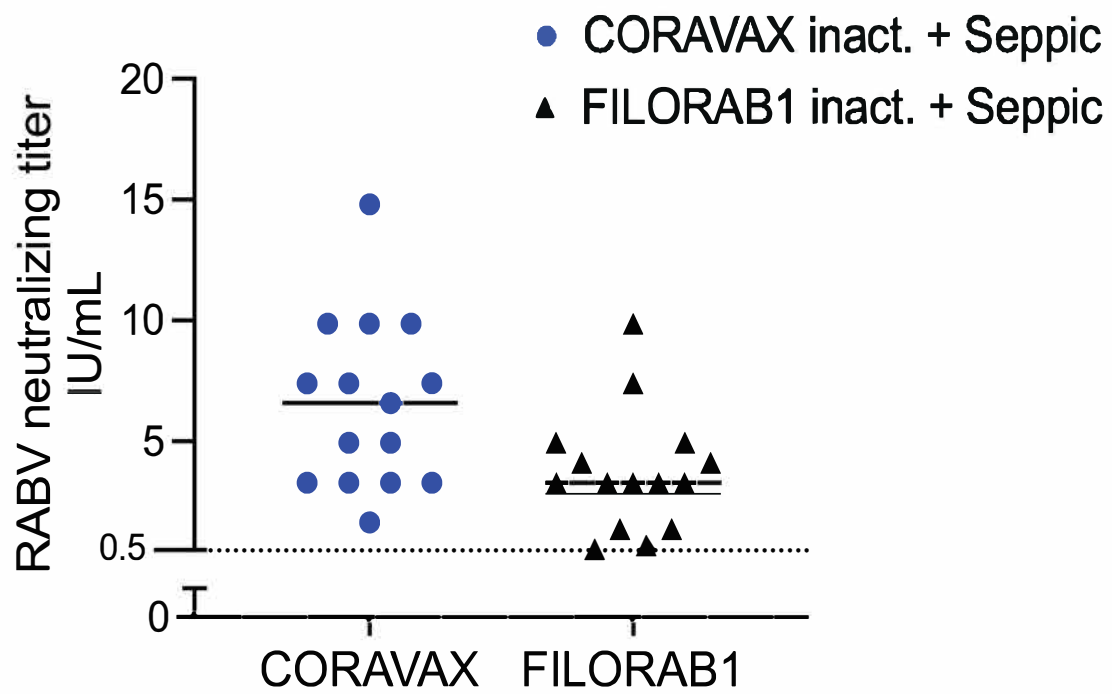

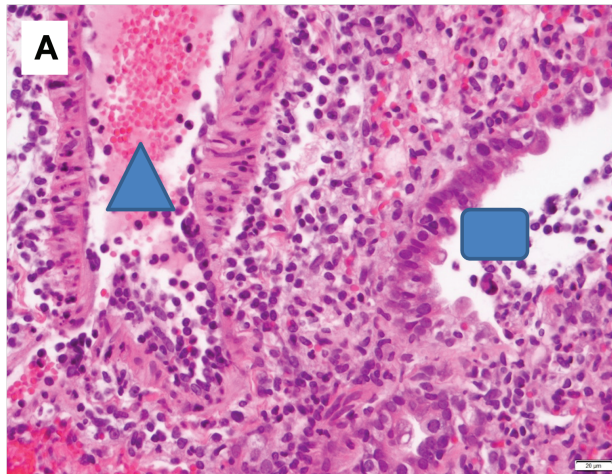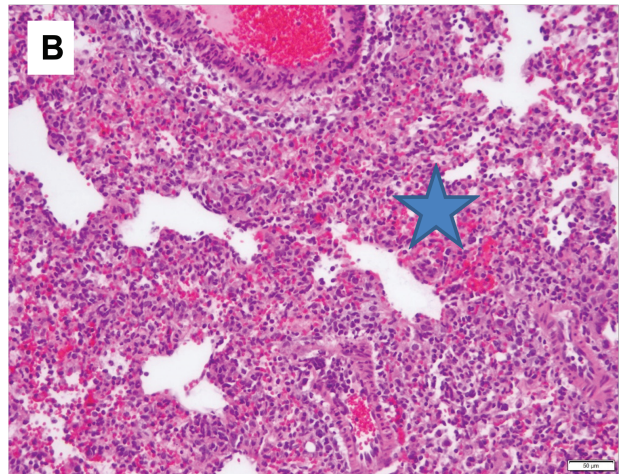

-  Interstitial Congestion and edema
-  Alveolar edema
-  Severe Inflammation and alveolar hemorrhage
-  Vasculitis
-  Bronchiolitis

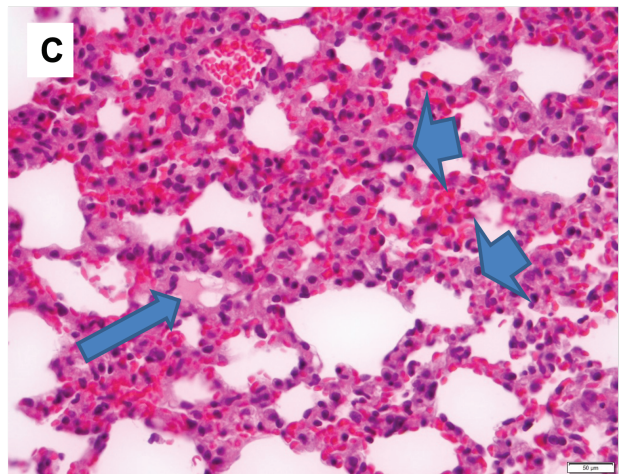

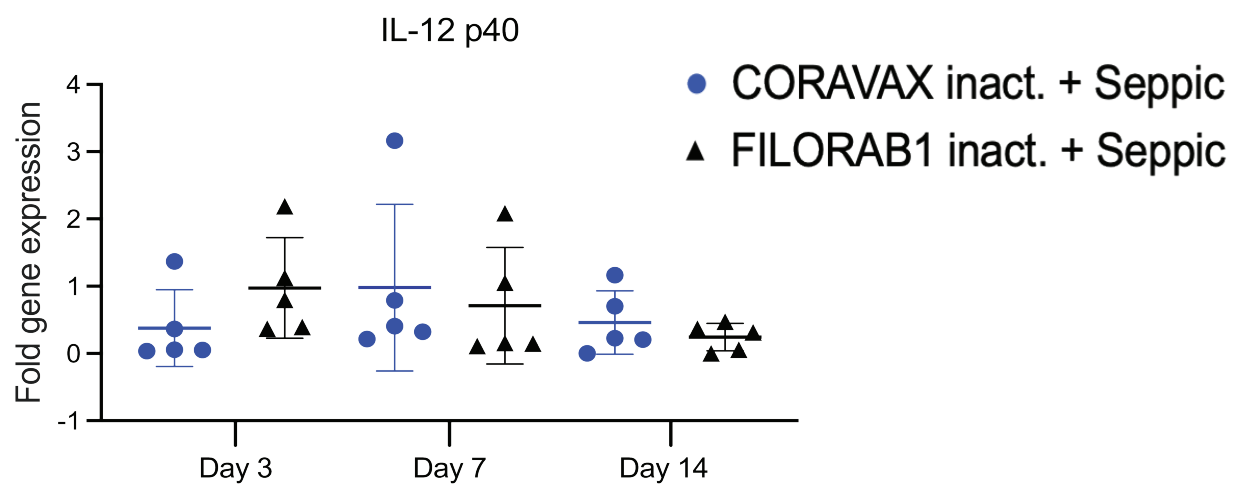

Table S1. Semi-quantitative histopathological scoring criteria.

| Categories             | Score criteria                                                                                                                                               | Score (Total score=27 per lung) <sup>a</sup>                                                                                                                                                                                                                                                                                                                             |
|------------------------|--------------------------------------------------------------------------------------------------------------------------------------------------------------|--------------------------------------------------------------------------------------------------------------------------------------------------------------------------------------------------------------------------------------------------------------------------------------------------------------------------------------------------------------------------|
| General evaluation (G) | Assessment percentage of lung damage area under 4x objective lens                                                                                            | 0 none<br>1 focal lung inflammation within one lobe or <30% of total lung cutting area <sup>b</sup><br>2 diffuse lung inflammation within one lobe or involving 30-70% total lung cutting area<br>3 diffuse lung inflammation involving more than one lobe or 70% total lung cutting area                                                                                |
| Bronchioles (B)        | Assessing appearance and severity of peribronchiolar infiltration, intrabronchiolar wall infiltration and bronchiolar epithelial cell death/desquamation     | 0 none<br>1 peribronchiolar infiltration only<br>2 peribronchiolar and epithelial infiltration (mild to moderate)<br>3 severe bronchiolar wall infiltration and epithelium desquamation                                                                                                                                                                                  |
| Alveoli (A)            | Assessing the appearance, scope involved, and severity of alveolar septal infiltration, alveolar space infiltration, alveolar space exudation and hemorrhage | 0 none<br>1 only alveolar wall thickening (interstitial congestion and edema), mild interstitial pneumonitis (<30%)<br>2 alveolar wall infiltration (interstitial pneumonitis), exudation or hemorrhage involving 30-70% of lung cutting area<br>3 diffuse alveolar infiltration (interstitial pneumonitis), exudation or hemorrhage involving >70% of lung cutting area |
| Vasculature (V)        | Severity of vasculature inflammation                                                                                                                         | 0 none,<br>1 only perivascular edema and or perivascular infiltration<br>2 mild infiltration within the vessel wall without endothelium infiltration<br>3 severe vasculitis                                                                                                                                                                                              |

<sup>a</sup> Total score = the scores of general assessment × the scores accumulated from individual category assessment <sup>b</sup> More than one lung lobes should be examined for histological assessment, if only one lobe were studied, percentage of the total lung cutting area would be used for scoring. Adapted from Lee et al. 2020 <sup>1</sup>.

1. Lee AC, *et al.* Oral SARS-CoV-2 Inoculation Establishes Subclinical Respiratory Infection with Virus Shedding in Golden Syrian Hamsters. *Cell Rep Med* **1**, 100121 (2020).



Table S2. List of cytokine/chemokine qPCR primers and probes sequences.

| Type of Multiplex | Cytokine/Chemokine | Reporter Dye |     | FW Primer 5' to 3'                 | REV Primer 5' to 3'                    | Probe 5' to 3'                               |
|-------------------|--------------------|--------------|-----|------------------------------------|----------------------------------------|----------------------------------------------|
| 5-Plex            | $\gamma$ -actin    | VIC          | MGB | ACA GAG AGA AGA TGA CGC AGA TAA TG | GCC TGA ATG GCC ACG TAC A              | TTG AAA CCT TCA ACA CCC CAG CC               |
|                   | IFN- $\gamma$      | FAM          | MGB | TGT TGC TCT GCC TCA CTC AGG        | AAG ACG AGG TCC CCT CCA TTC            | TGG CTG CTA CTG CCA GGG CAC ACT C            |
|                   | CCL17              | ABY          | QSY | CGA GTG CTG CCT GGA GAT C          | TGA TGG CCT TCT TCA CAT GC             | TGTGACTGTCCAGGGCAGGTCCA                      |
|                   | CCL3               | JUN          | QSY | GGT CCA AGA GTA CGT CGC TG         | GAG TTG TGG AGG TGG CAA GG             | JIRA-55614; Thermo Fisher generated sequence |
|                   | CCL5               | ALEXA680     | QSY | TCA GCT TGG TTT GGG AGC AA         | TGA AGT GCT GGT TTC TTG GGT            | JIRA-55614;Thermo Fisher generated sequence  |
|                   |                    |              |     |                                    |                                        |                                              |
| 5-Plex            | $\gamma$ -actin    | VIC          | MGB | ACA GAG AGA AGA TGA CGC AGA TAA TG | GCC TGA ATG GCC ACG TAC A              | TTG AAA CCT TCA ACA CCC CAG CC               |
|                   | CXCL10             | FAM          | MGB | TAC GTC GGC CTA TGG CTA CT         | TTG GGG ACT CTT GTC ACT GG             | APH6E47; Thermo Fisher generated sequence    |
|                   | IFN- $\alpha$      | ABY          | QSY | TCG TTG CTG CTC CCG TAG TC         | ATG GAT CCC GCT GCA ATT C              | TGGGTGCTGTGGGCTTCACTGG                       |
|                   | IL-10              | JUN          | QSY | AGC TGG ACA ACA TAC TAC TCA CTG A  | GGT TTG GCA ACC CAA GTA ACC            | CTCCTTACTGCAGGACTTTAAG                       |
|                   | IL-12-p40          | ALEXA680     | QSY | AAT GCG AGG CAG CAA ATT ACT C      | CTG CTC TTG ACG TTG AAC TTC AAG        | CCT GCT GGT GGC TGA CTG CAA TCA              |
|                   |                    |              |     |                                    |                                        |                                              |
| 5-Plex            | $\gamma$ -actin    | VIC          | MGB | ACA GAG AGA AGA TGA CGC AGA TAA TG | GCC TGA ATG GCC ACG TAC A              | TTG AAA CCT TCA ACA CCC CAG CC               |
|                   | IL-17              | FAM          | MGB | AGGAACCTTGGAGAGATGGT               | AGACAGGCTTCTCTGTTGG                    | GCCCAGCTGAGGAACAGCTCTGAGCCAGCCAAGAG          |
|                   | IL-2               | ABY          | QSY | GTG CAC CCA CTT CAA GCT CTA A      | AAG CTC CTG TAA GTC CAG CAG TAA C      | AGGAAACCCAGCAGCACCTCGAGC                     |
|                   | IL-21              | JUN          | QSY | GGA CAG TGG CCC ATA AAA CAA G      | TTC AAC ACT GTC TAT AAG ATG ACG AAG TC | CAA GGG CCA GAT CGC CTC CTG ATT              |
|                   | IL-4               | ALEXA680     | QSY | ACA GAA AAA GGG ACA CCA TGC A      | GAA GCC CTG CAG ATG AGG TCT            | AGA CGC CCT TTC AGC AAG GAA GAA CTC C        |
|                   |                    |              |     |                                    |                                        |                                              |
| 4-Plex            | $\gamma$ -actin    | VIC          | MGB | ACA GAG AGA AGA TGA CGC AGA TAA TG | GCC TGA ATG GCC ACG TAC A              | TTG AAA CCT TCA ACA CCC CAG CC               |
|                   | IL-6               | FAM          | MGB | CCT GAA AGC ACT TGA AGA ATT CC     | GGT ATG CTA AGG CAC AGC ACA CT         | AGAAGTCACCATGAGGTCTACTCGCAAAA                |
|                   | TGF- $\beta$ 1     | ABY          | QSY | GGC TAC CAC GCC AAC TTC TG         | GAG GGC AAG GAC CTT ACT GTA CTG        | CCC TGT CCC TAC ATT TGG AGC CTG GA           |
|                   | TNF- $\alpha$      | JUN          | QSY | TGA GCC ATC GTG CCA ATG            | AGC CCG TCT GCT GGT ATC AC             | CGG CAT GTC TCT CAA AGA CAA CCA G            |
